# Supplementary material
Source: ML conference proceedings conference paper supplement (https://openreview.net/forum?id=DcSno6F6o3)

Evaluating all policies with metrics (legend)  
from training trajectories

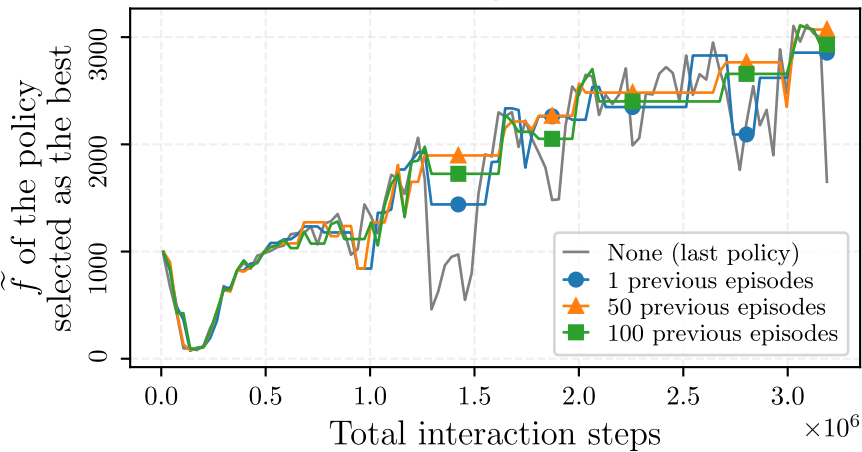

Evaluating policies with a frequency (legend)  
in 5 validation episodes

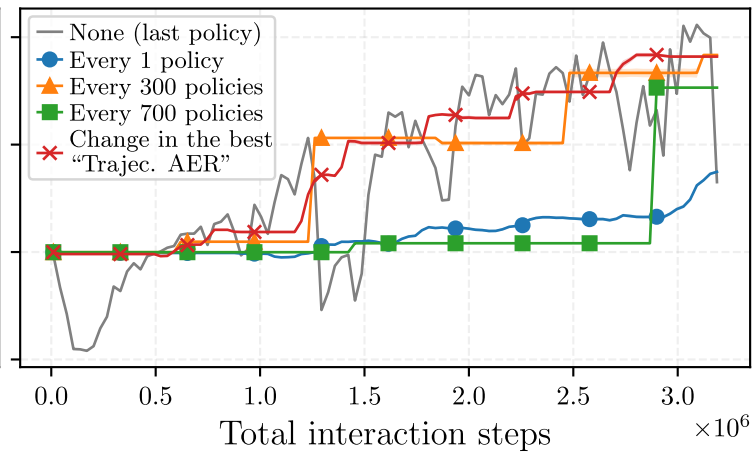

Supplement: supplementary_material [file attachment]
